# Supplementary material for: Ischemic postconditioning influences electron transport chain protein turnover in Langendorff-perfused rat hearts
Source: PeerJ. 2016 Feb 16;4:e1706. doi: 10.7717/peerj.1706 (PMC4768691; doi:10.7717/peerj.1706)
Supplement: Data S1 [file peerj-04-1706-s001.xlsx]

## Sheet: Sheet1
Raw data of figures
Fig 2A
Group	T1						T2
Nor	318	283	291	293	279	300	290	279	283	272	287	305
I/R	309	308	308	288	290	271	286	249	267	243	242	243
IPo	288	289	301	299	280	260	264	282	296	294	267	270
5-HD	262	293	280	281	296	292	218	270	242	206	264	222
Fig 2B
Group	T1						T2
Nor	4961	5682	4976	4907	5702	4924	4705	4978	3917	5015	4971	4890
I/R	5407	5120	4666	4578	5566	5107	2394	2239	2308	2881	3558	2394
IPo	5036	5139	4937	5619	5175	5006	3777	4767	4674	4261	4417	3802
5-HD	4612	5240	4955	4965	5207	4721	1895	2569	2495	2406	2371	1800
Fig 2C
Group	T1						T2
Nor	113	130	140	107	135	131	121	106	101	99	99	110
I/R	120	141	134	99	121	93	66	70	99	88	87	64
Ipo	106	100	125	119	119	121	103	125	114	103	90	95
5-HD	100	128	119	123	120	130	62	60	69	59	89	69
Fig 2D
Group	T1						T2
Nor	3.39	4.53	3.11	3.84	3.72	4.49	8.71	6.59	6.59	7.12	6.69	8.11
I/R	4.88	4.03	2.78	3.92	3.99	4.98	27.95	25.4	17.14	25.72	16.39	22.2
Ipo	3.8	5.7	4.8	5.62	3.93	3.14	8.85	6.35	8.85	5.98	8.61	7.83
5-HD	4.99	3.25	4.63	3.28	3.93	4.61	21.4	20.95	24.57	30.8	29.09	25.03
Fig 2E
Nor	I/R	IPo	5-HD
8.55	22.06	11.22	19.63
7.15	23.37	12.28	22.35
7.5	25.63	10.07	20.23
6.54	22.5	15.27	22.78
Fig 3E
Nor	I/R	IPo	5-HD
1.12	2.85	1.22	2.5
1.05	3.01	1.35	2.84
0.93	2.99	1.55	2.75
0.88	2.64	1.31	2.03
1.2	2.73	1.7	2.33
Fig 6E
Protein	I/R			IPo
DLD	11.45	10.28	10.79	14.84	12.14	13.29
NDUFV1	6.63	7.34	6.02	8.6	9.74	12.43
Fig 6F
Protein	Ipo			5-HD
DLD	6.03	5.04	4.92	3.22	3.64	4.04
GRP75	5.32	4.04	4.15	5.72	6.7	6.69
